# Supplementary material for: A fungal member of the Arabidopsis thaliana phyllosphere antagonizes Albugo laibachii via a GH25 lysozyme
Source: eLife. 2021 Jan 11;10:e65306. doi: 10.7554/eLife.65306 (PMC7870139; doi:10.7554/eLife.65306)
Supplement: Figure 1—source data 1. [file elife-65306-fig1-data1.xlsx]

## Sheet: Tabelle1
Albugo	Albugo + SC	Albugo + SC + Msp	Albugo + Msp
37.5	25	37.5	0
57.1429	11.1111	0	0
33.3333	11.1111	0	0
62.5	28.5714	12.5	14.2857
37.5	12.5	0	0
25	28.5714	25	0
50	20	11.1111	0
25	28.5714	12.5	0
50	28.5714	10	11.1111
28.5714	28.5714	0	0
28.5714	14.2857	0	0
57.1429	11.1111	0	0
44.4444	16.6667	11.1111	0
33.3333	12.5	0	10
33.3333	0	0	11.1111
28.5714	20	0	0
33.3333	0	0	0
33.3333	11.1111	0	0
28.5714	0	0	0
36.3636	11.1111	0	0
28.5714	12.5	0	0
37.5	12.5	0	0
25	10	22.2222	0
28.5714	22.2222	0	0
37.5	10	0	12.5
20	12.5	0	0
14.2857	22.2222	0	0
42.8571	0	0	0
37.5	16.6667	0	0
14.2857	0	0	0
33.3333	33.3333	12.5	0
28.5714	0	22.2222	0
14.2857	20	0	0
22.2222	37.5	0	20
37.5	28.5714	22.2222	12.5
37.5	16.6667	0	12.5
62.5	0	20	25
33.3333	12.5	25	11.1111
25	25	0	10
28.5714	37.5	25	44.4444
37.5	25	11.1111	11.1111
33.3333	0	14.2857	11.1111
28.5714	25	0	14.2857
33.3333	0	11.1111	0
28.5714	12.5	0	25
40	25	0	12.5
33.3333	22.2222	0	12.5
16.6667	12.5	14.2857	14.2857
40	37.5	10	28.5714
12.5	28.5714	14.2857	12.5
28.5714	37.5	0	14.2857
42.8571	25	14.2857	0
28.5714	11.1111	0	0
62.5	25	0	0
28.5714	12.5	28.5714	25
28.5714	50	0	0
20	12.5	11.1111	0
37.5	14.2857	0	25
33.3333	33.3333	0	25
25	0	12.5	28.5714
28.5714	0	11.1111
33.3333	28.5714	28.5714
37.5	14.2857	14.2857
28.5714	28.5714	12.5
	14.2857
