# Supplementary material for: A fungal member of the Arabidopsis thaliana phyllosphere antagonizes Albugo laibachii via a GH25 lysozyme
Source: eLife. 2021 Jan 11;10:e65306. doi: 10.7554/eLife.65306 (PMC7870139; doi:10.7554/eLife.65306)
Supplement: Figure 5—source data 1. [file elife-65306-fig5-data1.xlsx]

## Sheet: Filament formation
U. maydis FB2				M. albugensis WT						U. maydis FB2	U. maydis SG200	M. albugensis WT	M. albugensis CB1
Replicate 1				Replicate 1					Mean
Yeast	237	0.738318		Yeast	275	0.851393			Yeast	0.822329	0.579205	0.824963	0.623906
Filament	84	0.261682		Filament	48	0.148607			Filament	0.177671	0.420795	0.175037	0.376094
	321				323				Standard deviation
Replicate 2				Replicate 2					Yeast	0.072862	0.0592864	0.0263361	0.114622
Yeast	290	0.868263		Yeast	250	0.798722			Filament	0.072862	0.0592864	0.0263361	0.114622
Filament	44	0.131737		Filament	63	0.201278
	334				313
Replicate 3				Replicate 3
Yeast	339	0.860406		Yeast	273	0.824773
Filament	55	0.139594		Filament	58	0.175227
	394				331
Total number of counted cells	1049			Total number of counted cells	967
U. maydis SG200				M. albugensis CB1																						X² > 7.88
Replicate 1				Replicate 1																						X² ≤ 7.88
Yeast	189	0.530899		Yeast	280	0.712468
Filament	167	0.469101		Filament	113	0.287532
	356				393
Replicate 2				Replicate 2
Yeast	202	0.645367		Yeast	178	0.494444
Filament	111	0.354633		Filament	182	0.505556
	313				360
Replicate 3				Replicate 3
Yeast	183	0.56135		Yeast	238	0.664804
Filament	143	0.43865		Filament	120	0.335196
	326				358
Total number of counted cells	995			Total number of counted cells	1111

## Sheet: Appressoria quantification
Sg200 EtOH				CB1 EtOH						SG200		CB1
Replicate 1				Replicate 1						EtOH	HPS	EtOH	HPS
Appressoria Yes	13	0.0625		Appressoria Yes	30	0.135747			Mean
Appressoria No	195	0.9375		Appressoria No	191	0.864253			Yes	0.0761057	0.218707	0.141458	0.229199
	208				221				No	0.923894	0.781293	0.858542	0.770801
Replicate 2				Replicate 2					Standard deviation
Appressoria Yes	20	0.0917431		Appressoria Yes	34	0.146552			Yes	0.014727	0.0249705	0.00542902	0.0150332
Appressoria No	198	0.908257		Appressoria No	198	0.853448			No	0.014727	0.0249705	0.00542902	0.0150332
	218				232
Replicate 3				Replicate 3
Appressoria Yes	16	0.0740741		Appressoria Yes	26	0.142077
Appressoria No	200	0.925926		Appressoria No	157	0.857923
	216				183
Total number of counted cells	642			Total number of counted cells	636
SG200 HPS				CB1 HPS
Replicate 1				Replicate 1
Appressoria Yes	51	0.244019		Appressoria Yes	45	0.222772
Appressoria No	158	0.755981		Appressoria No	157	0.777228
	209				202
Replicate 2				Replicate 2
Appressoria Yes	46	0.218009		Appressoria Yes	51	0.246377
Appressoria No	165	0.781991		Appressoria No	156	0.753623
	211				207
Replicate 3				Replicate 3
Appressoria Yes	46	0.194093		Appressoria Yes	45	0.218447
Appressoria No	191	0.805907		Appressoria No	161	0.781553
	237				206
Total number of counted cells	657			Total number of counted cells	615

## Sheet: Chi-Square test
observed values				expected values					Chi-Square Test			observed values				expected values					Chi-Square Test
Strain	Yeast	Filament	Total	Strain	Yeast	Filament	Total		Yeast	Filament		Strain	Appressoria Yes	Appressoria No	Total	Strain	Appressoria Yes	Appressoria No	Total		Appressoria Yes	Appressoria No
												SG200				SG200
FB2	866	183	1049	FB2	739.022	309.978	1049		21.8174	52.015		EtOH	49	593	642	EtOH	94.8915	547.109	642		22.194	3.84937
SG200	574	421	995	SG200	700.978	294.022	995		23.0015	54.8379		HPS	143	514	657	HPS	97.1085	559.891	657		21.6873	3.76149
Total	1440	604	2044	Total	1440	604	2044		44.8189	106.853		Total	192	1107	1299	Total	192	1107	1299		43.8814	7.61086
								χ2	151.672			CB1				CB1				χ2	51.4922
Msp	798	169	967	Msp	695.235	271.765	967		15.1901	38.8596		EtOH	90	546	636	EtOH	117.439	518.561	636		6.41091	1.45188
CB1	696	415	1111	CB1	798.765	312.235	1111		13.2213	33.8229		HPS	141	474	615	HPS	113.561	501.439	615		6.62982	1.50146
Total	1494	584	2078	Total	1494	584	2078		28.4113	72.6824		Total	231	1020	1251	Total	231	1020	1251		13.0407	2.95334
								χ2	101.094											χ2	15.9941
H0: There is no difference between wildtype and mutant regarding filament formation												H0: There is no difference in appressoria formation due to HPS treatment
α	0.0001	0.0001										α	0.0001	0.0001
dF	1	1										dF	1	1
χ2	151.672	101.094										χ2	51.4922	15.9941
P-value	7.47402e-35	8.77298e-24										P-value	7.18803e-13	6.35408e-05
χ2-crit	15.1367	15.1367										χ2-crit	15.1367	15.1367
Sig	Yes	Yes										Sig	Yes	Yes
