# Supplementary material for: A fungal member of the Arabidopsis thaliana phyllosphere antagonizes Albugo laibachii via a GH25 lysozyme
Source: eLife. 2021 Jan 11;10:e65306. doi: 10.7554/eLife.65306 (PMC7870139; doi:10.7554/eLife.65306)
Supplement: Figure 7—source data 1. [file elife-65306-fig7-data1.xlsx]

## Sheet: A
Albugo	Albugo + Msp	Albugo + MspΔg5	Albugo + MspΔg5755	Albugo + MspΔg2490_1	Albugo + MspΔg2490_2
37.5	0	0	0	25	25
57.1429	0	20	0	50	28.5714
33.3333	0	12.5	0	11.1111	42.8571
62.5	14.2857	25	0	22.2222	28.5714
37.5	0	50	16.6667	20	28.5714
25	0	12.5	22.2222	28.5714	16.6667
50	0	0	0	42.8571	14.2857
25	0	16.6667	0	16.6667	0
50	11.1111	0	16.6667	25	28.5714
28.5714	0	11.1111	25	0	16.6667
28.5714	0	0	0	37.5	25
57.1429	0	0	0	14.2857	0
44.4444	0	0	0	0	14.2857
33.3333	10	0	0	25	11.1111
33.3333	11.1111	0	0	0	22.2222
28.5714	0	0	10	22.2222	11.1111
33.3333	0	12.5	0	37.5	12.5
33.3333	0	28.5714	0	0	22.2222
28.5714	0	0	0	28.5714	37.5
36.3636	0	0	0	0	16.6667
28.5714	0	12.5	0	22.2222	41.6667
37.5	0	44.4444	12.5	0	25
25	0	14.2857	0	16.6667	0
28.5714	0	16.6667	16.6667	25	12.5
37.5	12.5	12.5	20	0	28.5714
20	0	16.6667	0	40	28.5714
14.2857	0	0	0	14.2857	12.5
42.8571	0	16.6667	0	16.67	12.5
37.5	0	14.2857	25	14.29	28.5714
14.2857	0	0	0	16.6667	16.6667
33.3333	0	0	16.6667	25	0
28.5714	0	25	0	37.5	0
14.2857	0	33.3333	0	33.3333	0
22.2222	20	0	16.6667	37.5	12.5
37.5	12.5	25	11.1111	16.6667	28.5714
37.5	12.5	25	0	37.5	20
62.5	25	42.8571	10	25	16.6667
33.3333	11.1111	14.2857	12.5	0	28.5714
25	10	16.6667	0	0	0
28.5714	44.4444	0	0	28.5714	0
37.5	11.1111	14.2857	10	37.5	12.5
33.3333	11.1111	22.2222	10	50	28.5714
28.5714	14.2857	12.5	0	28.5714	25
33.3333	0	0	14.2857	0	28.5714
28.5714	25	22.2222	11.1111	37.5	14.2857
40	12.5	25	12.5	25	0
33.3333	12.5	20	16.6667	25	28.5714
16.6667	14.2857	37.5	0	28.5714	37.5
40	28.5714	0	0	14.2857	37.5
12.5	12.5	25	0	37.5	0
28.5714	14.2857	12.5	0	33.3333	37.5
42.8571	0	14.2857	0	37.5	20
28.5714	0	25	14.2857	25	28.5714
62.5	0	16.6667	12.5	28.5714	28.5714
28.5714	25	50	14.2857	28.5714	25
28.5714	0	14.2857	0	42.8571	12.5
20	0	0	0	28.5714	0
37.5	25	0	0	28.5714	14.2857
33.3333	25	12.5	14.2857	25	28.5714
25	28.5714	0	22.2222	11.1111	20
28.5714		0	14.2857		28.5714
33.3333		14.2857	14.2857		33.3333
37.5		0
28.5714

## Sheet: B
Albugo	Albugo + Msp	Albugo + MspΔg2490_1	Albugo + MspΔg2490_1_compl
33.3333	0	28.5714	0
33.3333	0	14.2857	0
33.3333	0	28.5714	0
11.1111	0	28.5714	11.1111
28.5714	11.1111	14.2857	0
36.3636	0	28.5714	11.1111
28.5714	9.09091	14.2857	0
16.6667	11.1111	28.5714	0
37.5	0	28.5714	20
33.3333	14.2857	37.5	22.2222
28.5714	14.2857	30	0
37.5	0	28.5714	0
44.4444	0	37.5	0
12.5	0	14.2857	0
33.3333	0	22.2222	11.1111
25	0	20	0
37.5	11.1111	33.3333	22.2222
37.5	11.1111	28.5714	0
33.3333	30	33.3333	0
55.5556	0	28.5714	10
22.2222	20	28.5714
55.5556	0	25
22.2222	0	0
16.6667	0	14.2857
44.4444	10	37.5
25	0	33.3333
37.5	0	28.5714
25	0	12.5
		44.4444
