# Supplementary material for: A fungal member of the Arabidopsis thaliana phyllosphere antagonizes Albugo laibachii via a GH25 lysozyme
Source: eLife journal article supplement (doi:10.7554/elife.65306), 2021-01-11
Supplement: supp [file elife_poa_e65306_Figure_1_figure_supplement_1.pdf › elife_poa_e65306_Figure_1_figure_supplement_1.pdf]

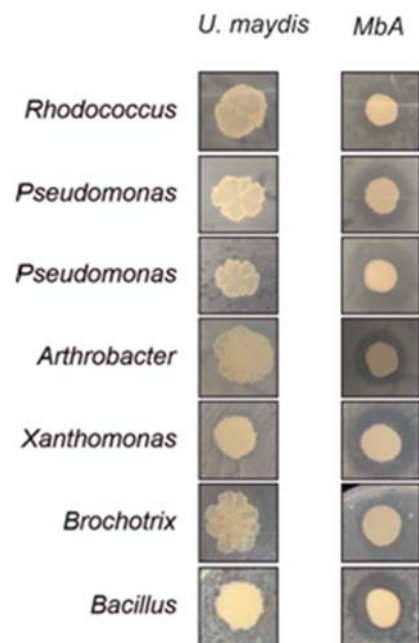

**Figure 1 – figure supplement 1:** Biocontrol activity of *MbA* but not *U. maydis* against bacterial SynCom members [1]. Inhibition by *Moesziomyces* can be seen by a characteristic halo formation after 48hrs of co-incubation.
