# Supplementary material for: A fungal member of the Arabidopsis thaliana phyllosphere antagonizes Albugo laibachii via a GH25 lysozyme
Source: eLife journal article supplement (doi:10.7554/elife.65306), 2021-01-11
Supplement: supp [file elife_poa_e65306_Figure_1_figure_supplement_2.pdf › elife_poa_e65306_Figure_1_figure_supplement_2.pdf]

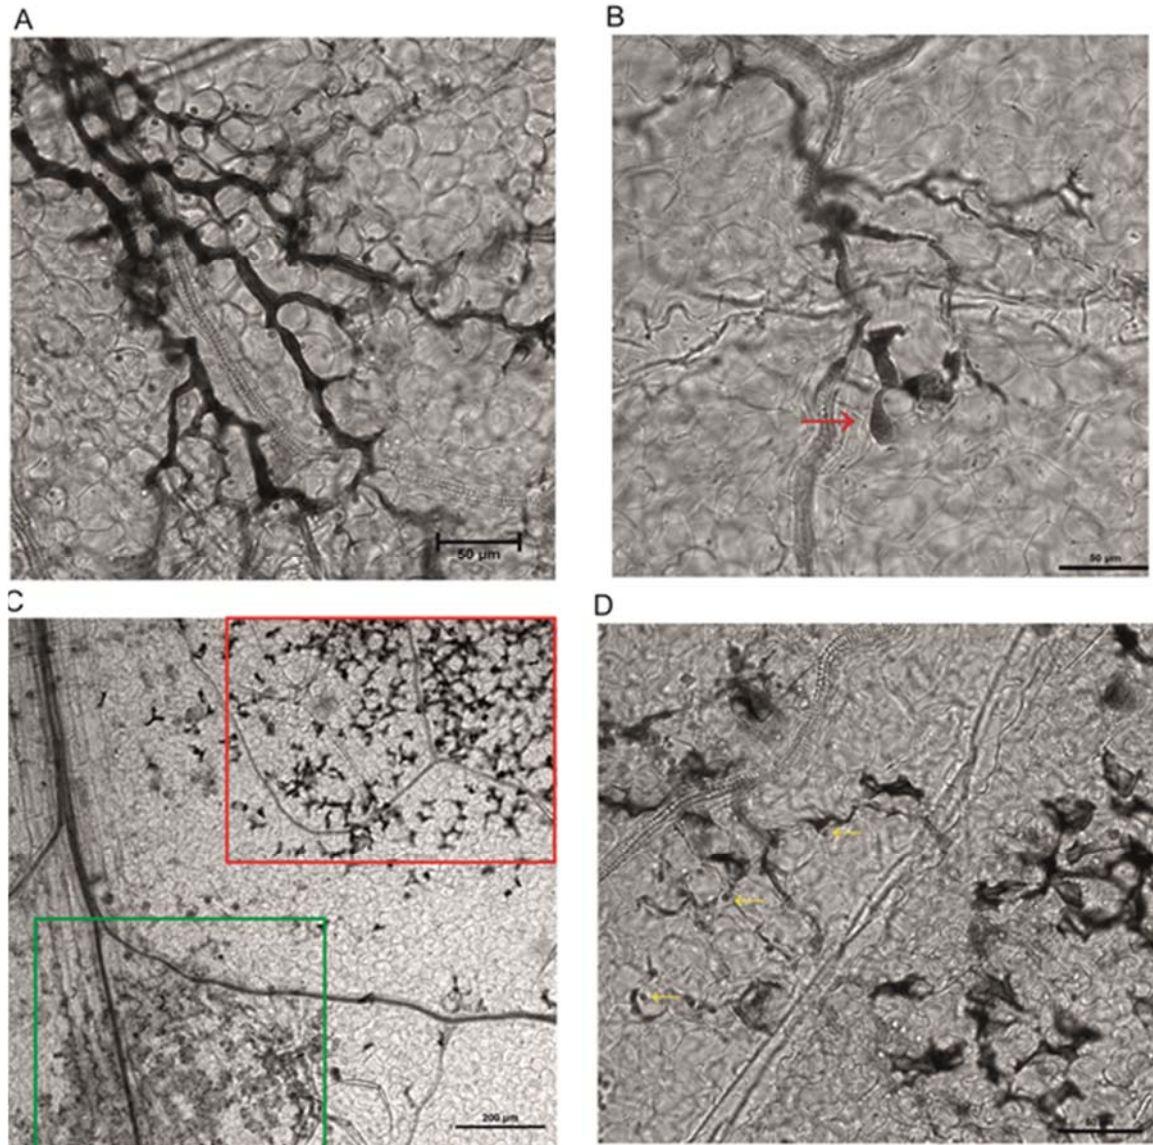

**Figure 1 – figure supplement 2:** Trypan blue staining of *A. thaliana* leaves 15 days post infection with *A. laibachii*. A & B - control set with only *A. laibachii* (error bar 50μm); A- Thick hyphal growth of *A. laibachii* on the leaf surface, B appressoria formation can be seen (red arrow). C & D- Treatment set (*MbA* sprayed two days before *A. laibachii*) C: Zoospores aggregated together, with few of them forming hyphae (green box); in addition, short, broken hyphae visualized in some regions (red box), which have not been found in Control sets; (error bar- 200μm) D: A closer look at the broken hyphae, yellow arrow indicates germinating cysts of *A. laibachii* (error bar - 50μm)
