# Supplementary material for: A fungal member of the Arabidopsis thaliana phyllosphere antagonizes Albugo laibachii via a GH25 lysozyme
Source: eLife journal article supplement (doi:10.7554/elife.65306), 2021-01-11
Supplement: supp [file elife_poa_e65306_Figure_2_figure_supplement_1.pdf › elife_poa_e65306_Figure_2_figure_supplement_1.pdf]

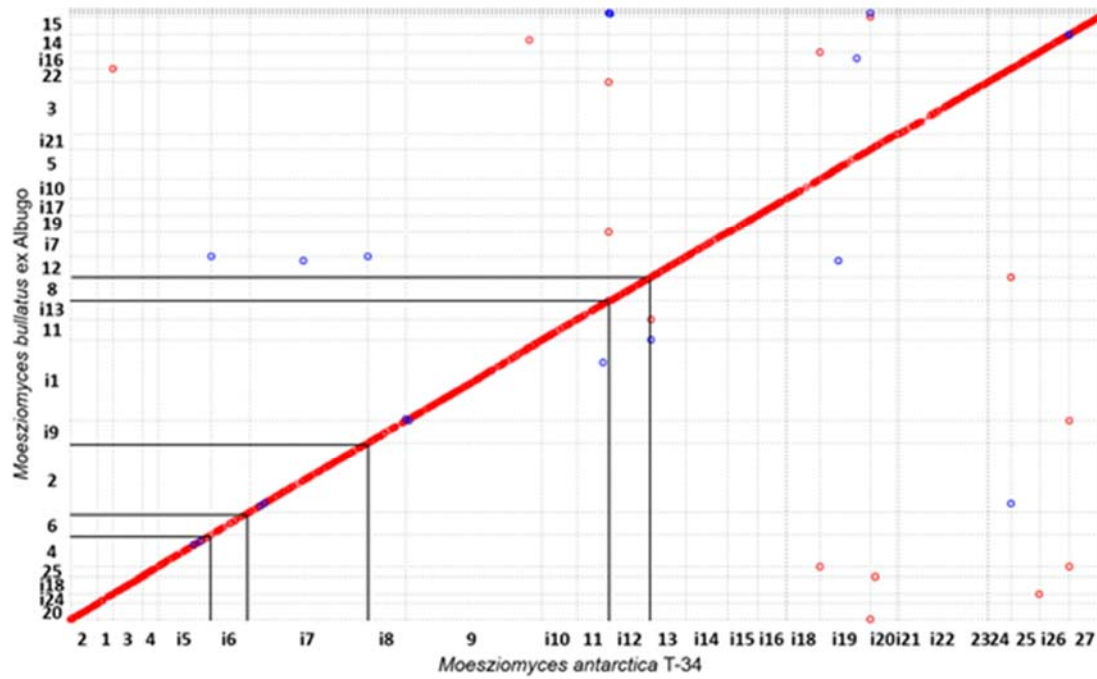

**Figure 2 – figure supplement 1:** Genome comparison of MbA and *Moesziomyces antarctica* T-34. Highlighted regions show that contigs with chromosomal rearrangements in MBA can be also found in the genome of the related species *Moesziomyces antarctica* T-34.
