# Supplementary material for: A fungal member of the Arabidopsis thaliana phyllosphere antagonizes Albugo laibachii via a GH25 lysozyme
Source: eLife journal article supplement (doi:10.7554/elife.65306), 2021-01-11
Supplement: supp [file elife_poa_e65306_Figure_3_figure_supplement_2.pdf › elife_poa_e65306_Figure_3_figure_supplement_2.pdf]

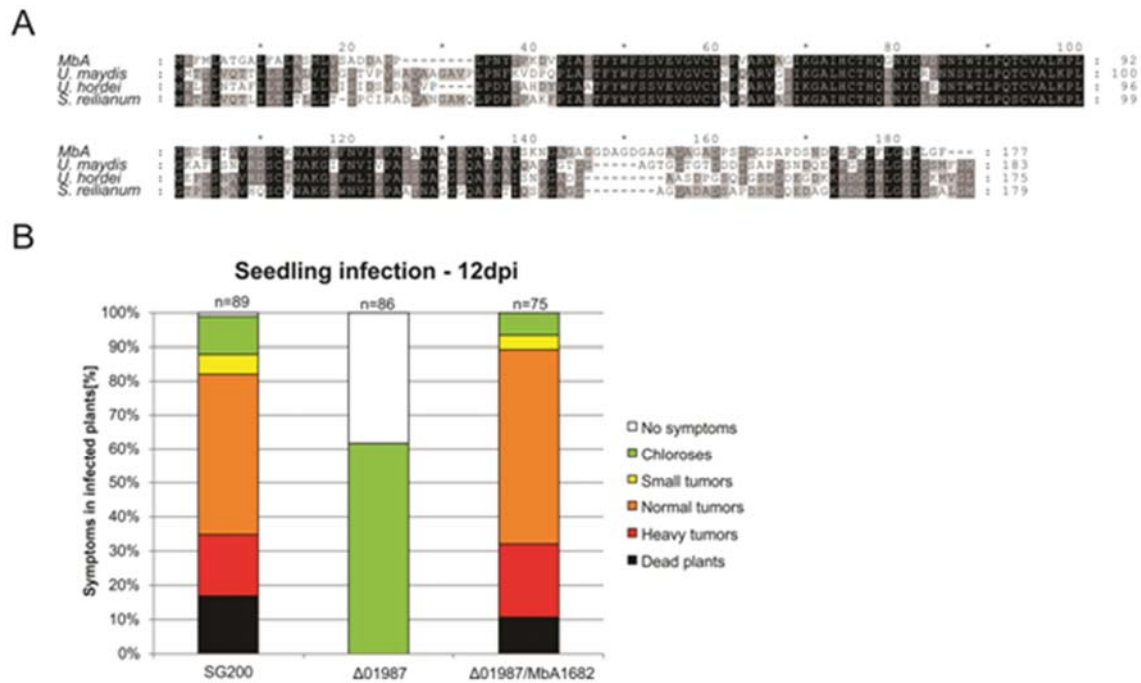

**Figure 3 – figure supplement 2:** Protein alignment of the core effector Pep1 (Hemetsberger et al, 2015) from different Ustilaginomycetes (A). All characterized regions important for functionality are present in all different sequences. Deletion of the *pep1* gene (UMAG\_01987) in *U. maydis* leads to complete loss of virulence, which can be restored by complementing the deletion mutant with the *MbA pep1* gene (Ma1682). Infection of maize leaves was done as described in [3]. Disease symptoms were scored at 12 days post infection in three independent biological replicates. n= number of plants infected
