# Supplementary material for: A fungal member of the Arabidopsis thaliana phyllosphere antagonizes Albugo laibachii via a GH25 lysozyme
Source: eLife journal article supplement (doi:10.7554/elife.65306), 2021-01-11
Supplement: supp [file elife_poa_e65306_Figure_3_figure_supplement_3.pdf › elife_poa_e65306_Figure_3_figure_supplement_3.pdf]

## Cluster 1A

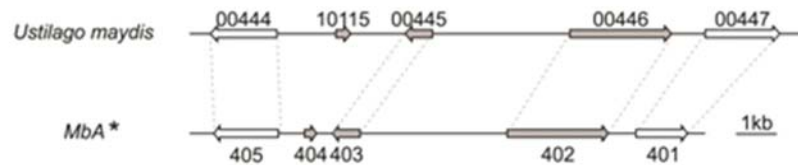

## Cluster 2A

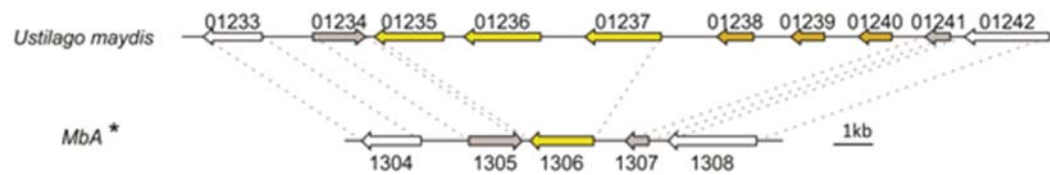

## Cluster 2B

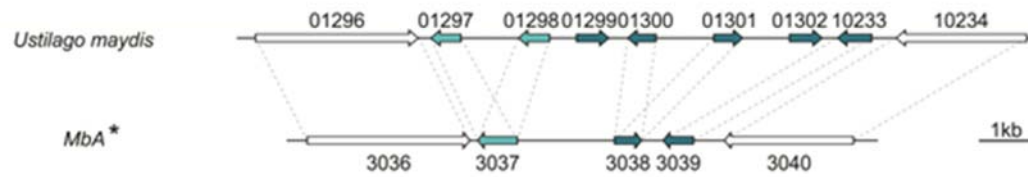

## Cluster 3A

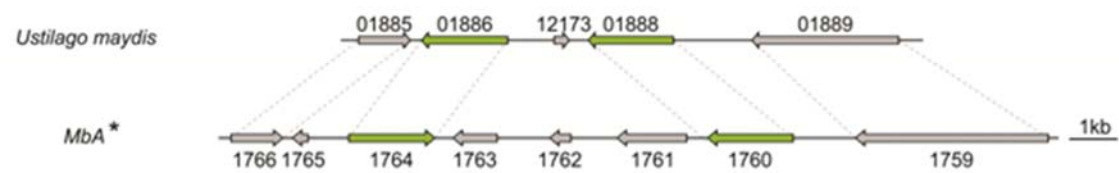

## Cluster 5A

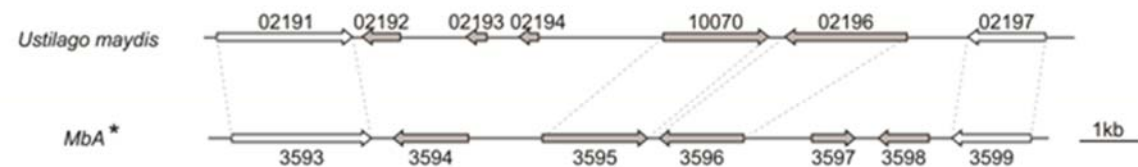

## Cluster 5B

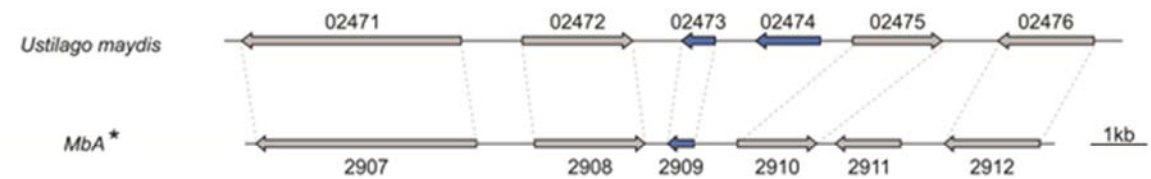

## Cluster 6A

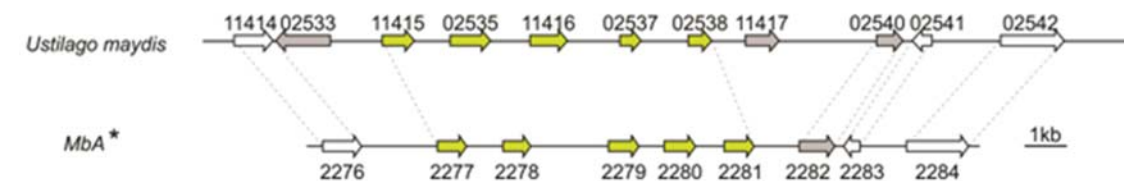

### Cluster 8A

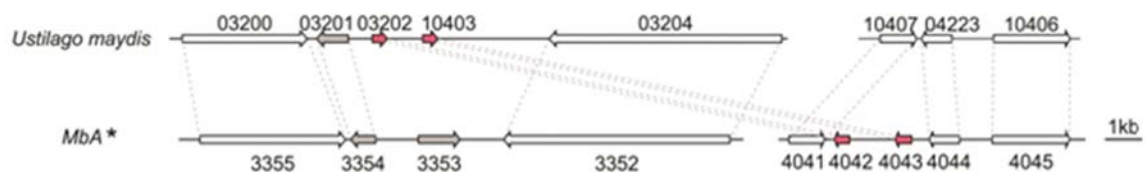

### Cluster 9A

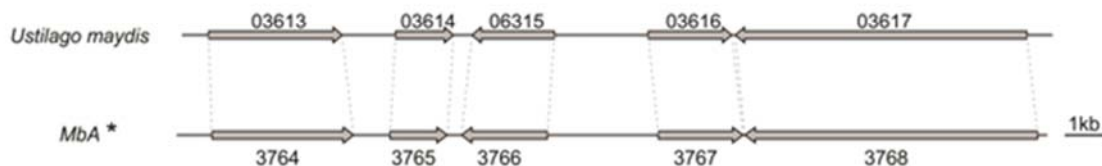

### Cluster 10A

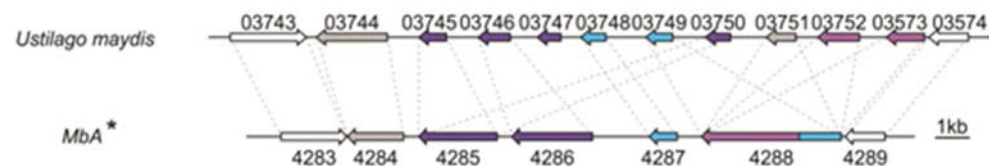

### Cluster 22A

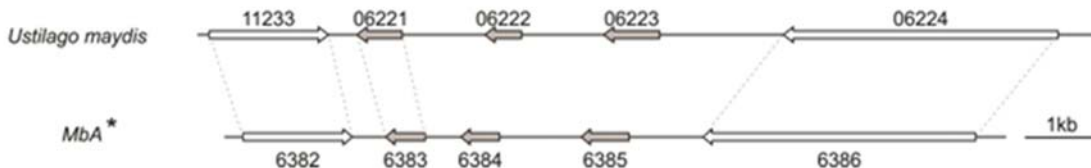

**Figure 3 – figure supplement 3:** Comparison of known virulence clusters [4] between *U. maydis* and *MbA*. Numbers are gene numbers (\*UMAG\_NUMBER\* for *U. maydis*; \*gNUMBER\* for *MbA*).
