# Supplementary material for: A fungal member of the Arabidopsis thaliana phyllosphere antagonizes Albugo laibachii via a GH25 lysozyme
Source: eLife journal article supplement (doi:10.7554/elife.65306), 2021-01-11
Supplement: supp [file elife_poa_e65306_Figure_5_figure_supplement_1.pdf › elife_poa_e65306_Figure_5_figure_supplement_1.pdf]

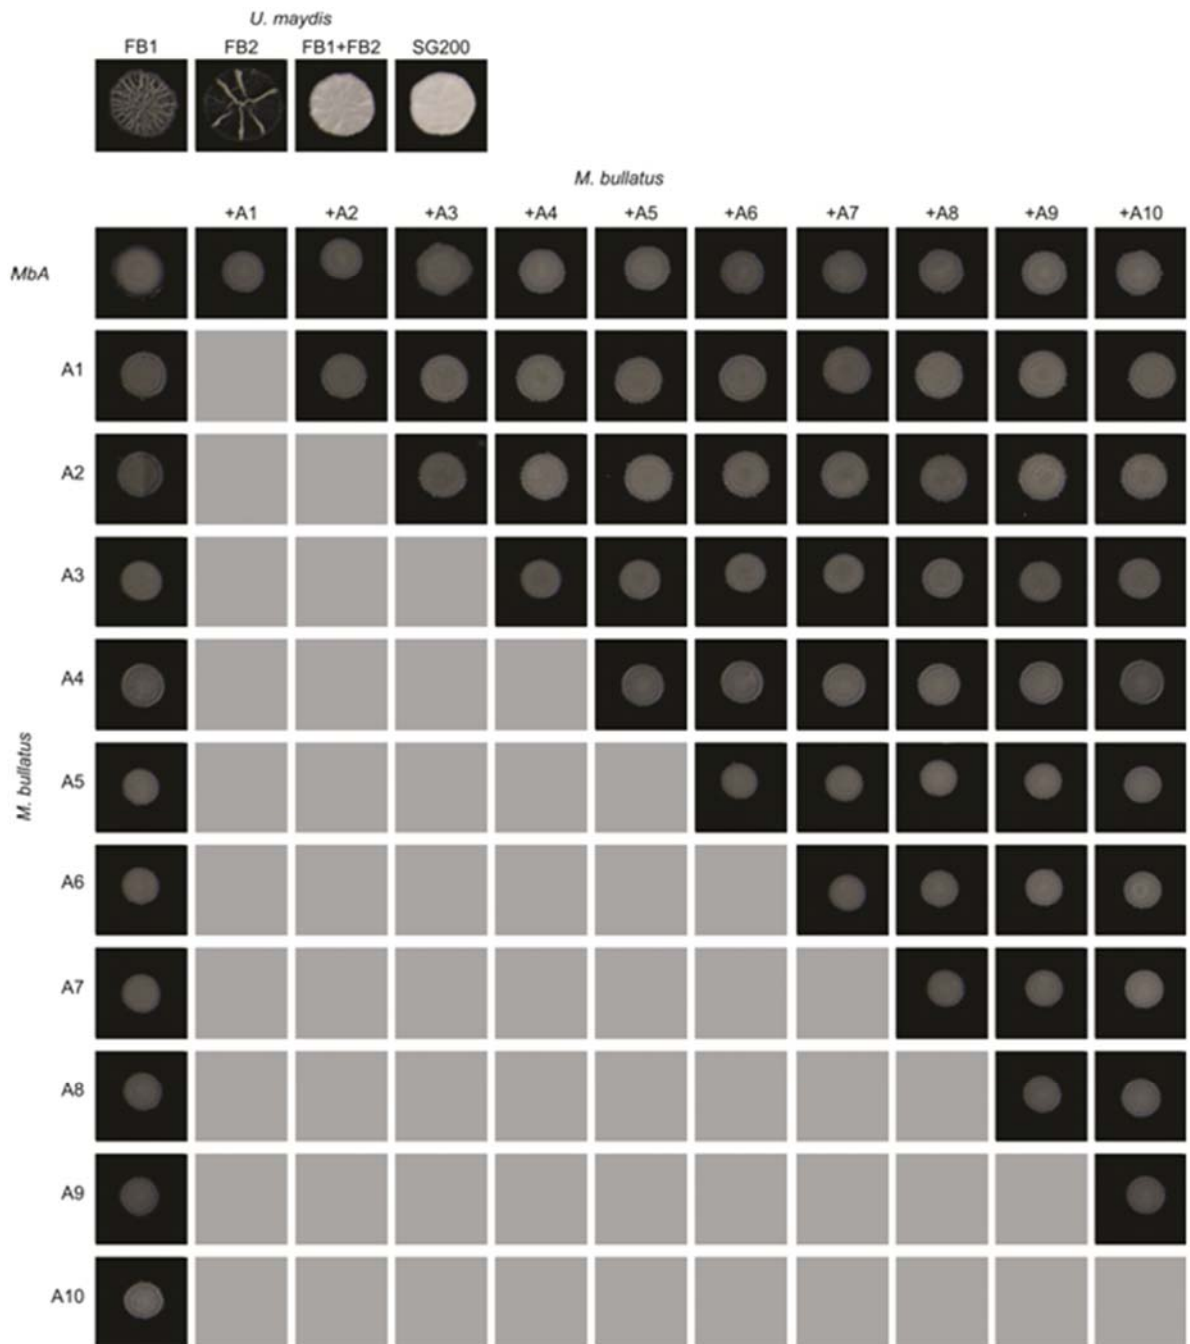

**Figure 5 – figure supplement 1:** Mating assays of *MbA* and different *M. bullatus* isolates. Mixing of haploid *U. maydis* strains FB1 & FB2 and the solopathogenic strain SG200 served as a positive control for mating on charcoal plates, where filamentous growth is indicated by white, fluffy appearance of colonies. Haploid wild type strains without mating partner don't show a fluffy phenotype. For all combinations of *Moesziomyces* strains, no mating event resulting in filamentous growth on charcoal plates has been observed.
