# Supplementary material for: A fungal member of the Arabidopsis thaliana phyllosphere antagonizes Albugo laibachii via a GH25 lysozyme
Source: eLife journal article supplement (doi:10.7554/elife.65306), 2021-01-11
Supplement: supp [file elife_poa_e65306_Figure_6_figure_supplement_1.pdf › elife_poa_e65306_Figure_6_figure_supplement_1.pdf]

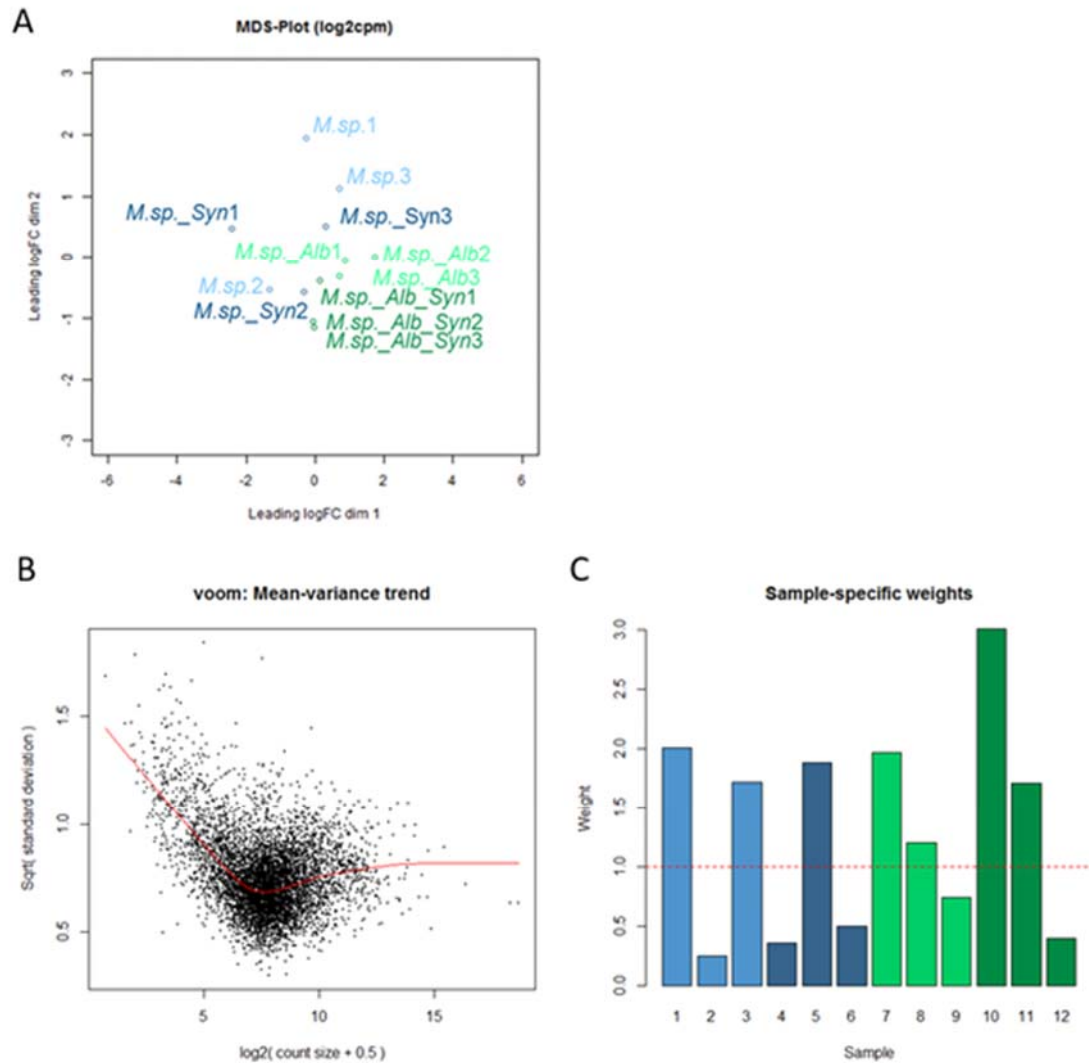

**Figure 6 – figure supplement 1:** A) A) Multi-dimensional scaling plot (MDS) plot based on the interactions of *Moesziomyces* sp. (*M.sp.*) / *MbA* in response to the SynCom bacteria and *Albugo laibachii* in three biological replicates. The MDS plot shows *Albugo* and non-*Albugo* samples grouping together based on gene-level logCPM. (B) Voom mean-variance trend of the dataset where points represent genes, and (C) sample-specific weights obtained from the *limma-voom* function. Colours represent three replicates for each treatment. Light blue: *MbA* on plant; Dark blue: *MbA* on plant + SynCom; Light green: *MbA* on plant + *Albugo*; Dark green: *MbA* on plant + *Albugo* + SynCom.
