# Supplementary material for: A fungal member of the Arabidopsis thaliana phyllosphere antagonizes Albugo laibachii via a GH25 lysozyme
Source: eLife journal article supplement (doi:10.7554/elife.65306), 2021-01-11
Supplement: supp [file elife_poa_e65306_Figure_6_figure_supplement_2.pdf › elife_poa_e65306_Figure_6_figure_supplement_2.pdf]

A

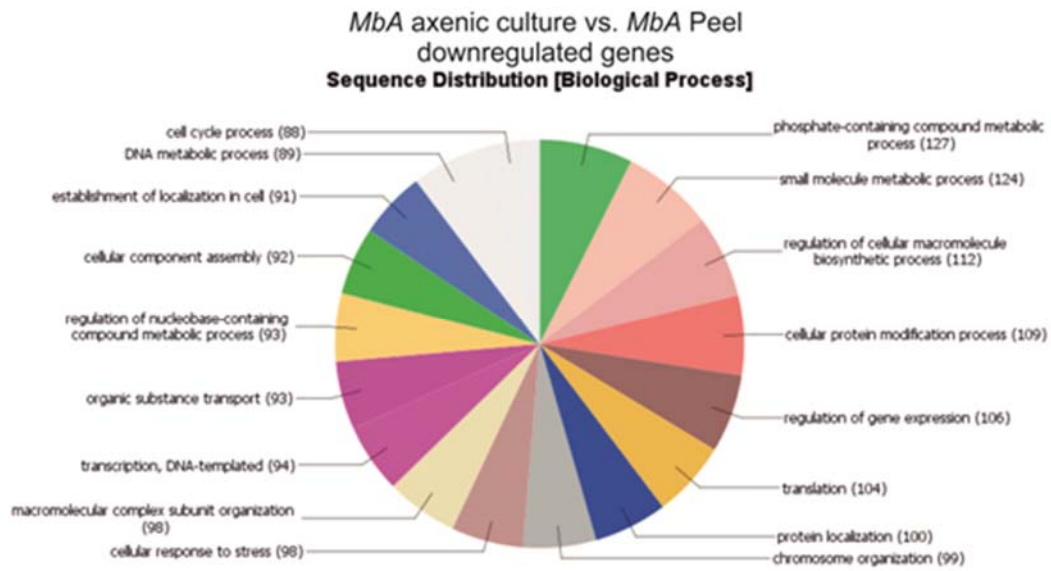

B

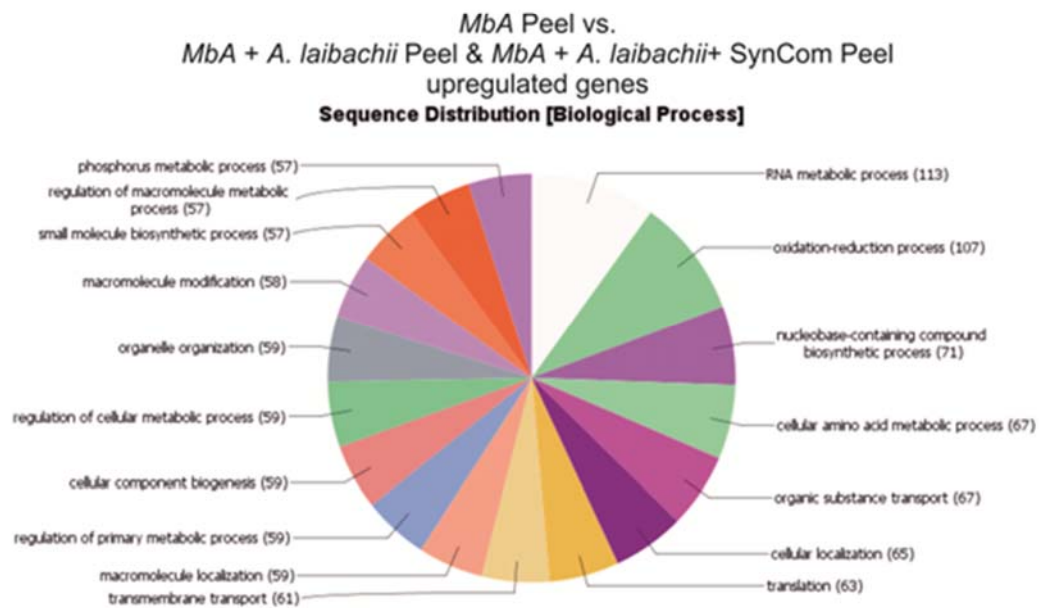

**Figure 6 – figure supplement 2:** (A) Sequence distribution of Gene Ontology terms. 60% of all genes, downregulated in *MbA* on plant compared to axenic culture growth, can be assigned to GO-terms related to metabolism and cell cycle. (B) In contrast, presence of *A. laibachii* leads to transcriptional activation of metabolic processes. 52% of all GO-terms associated with genes upregulated in presence of *A. laibachii* are related to metabolic processes.
