# Supplementary material for: A fungal member of the Arabidopsis thaliana phyllosphere antagonizes Albugo laibachii via a GH25 lysozyme
Source: eLife journal article supplement (doi:10.7554/elife.65306), 2021-01-11
Supplement: supp [file elife_poa_e65306_Figure_7_figure_supplement_1.pdf › elife_poa_e65306_Figure_7_figure_supplement_1.pdf]

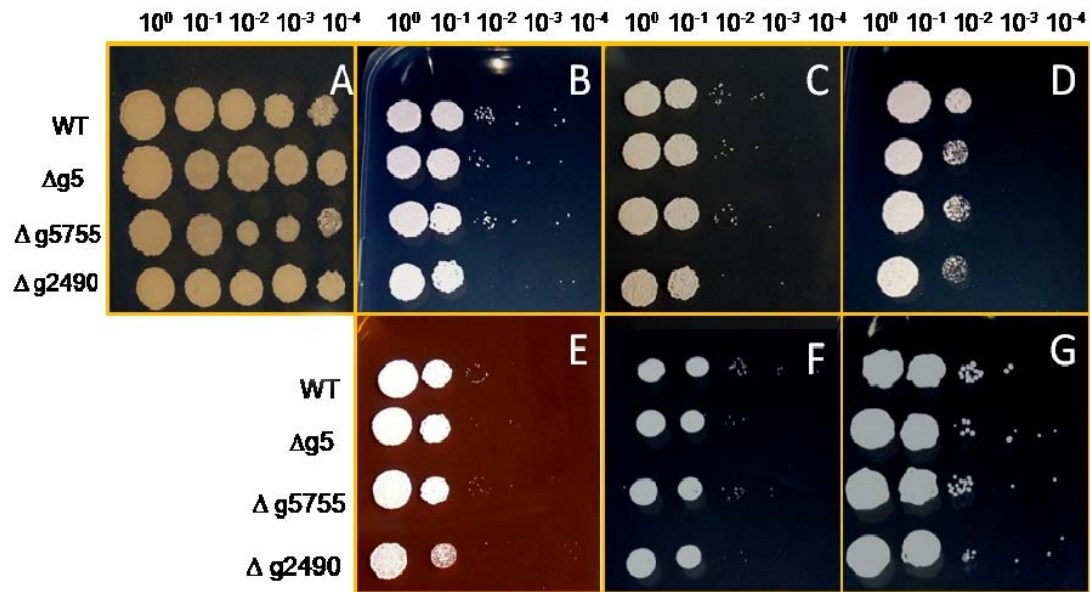

**Figure 7 – figure supplement 1:** Stress assay of *Mba* wild type and knockout mutants of gene (*g5*, *g5755* and *g2490*) respectively, on CM medium and 2% Glucose (A) with different conditions (B: 100  $\mu$ g/ml Calcofluor; C: 150  $\mu$ g/ml Calcofluor; D: 1 mM  $H_2O_2$ ; E: 45  $\mu$ g/ml Congo-red; F: 1 M NaCl; G: 1 M Sorbitol). The strains were dropped on the CM plates containing different stress supplements in a dilution series from  $10^0$  to  $10^{-4}$
