# Supplementary material for: A fungal member of the Arabidopsis thaliana phyllosphere antagonizes Albugo laibachii via a GH25 lysozyme
Source: eLife journal article supplement (doi:10.7554/elife.65306), 2021-01-11
Supplement: supp [file elife_poa_e65306_Figure_7_figure_supplement_3.pdf › elife_poa_e65306_Figure_7_figure_supplement_3.pdf]

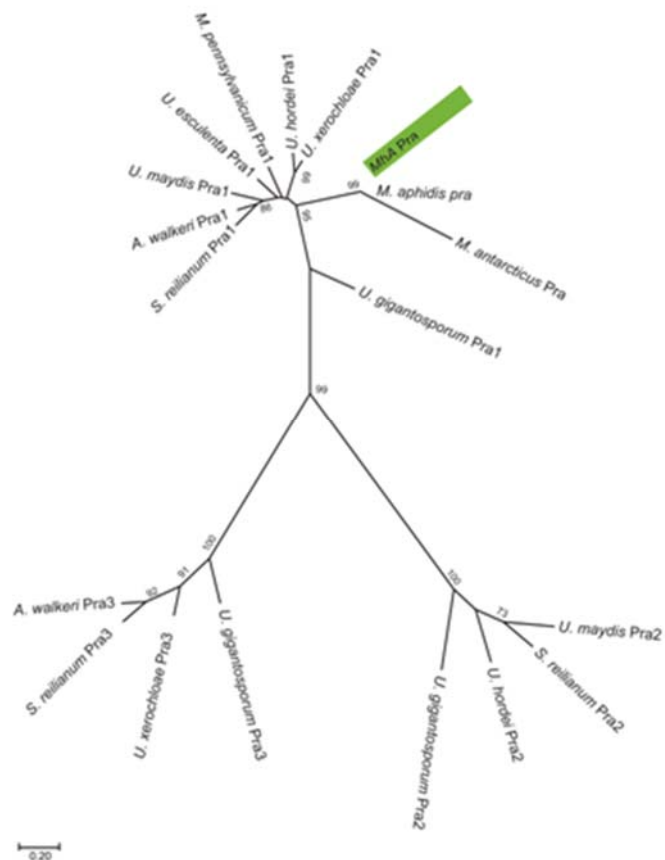

**Figure 7 – figure supplement 3:** A molecular phylogenetic analysis by maximum likelihood method based on pheromone receptor protein sequences. MbA protein sequence clusters together with type 1 pheromone receptors of other Ustilaginomycetes.
