# Supplementary material for: A fungal member of the Arabidopsis thaliana phyllosphere antagonizes Albugo laibachii via a GH25 lysozyme
Source: eLife journal article supplement (doi:10.7554/elife.65306), 2021-01-11
Supplement: supp [file elife_poa_e65306_Figure_7_figure_supplement_5.pdf › elife_poa_e65306_Figure_7_figure_supplement_5.pdf]

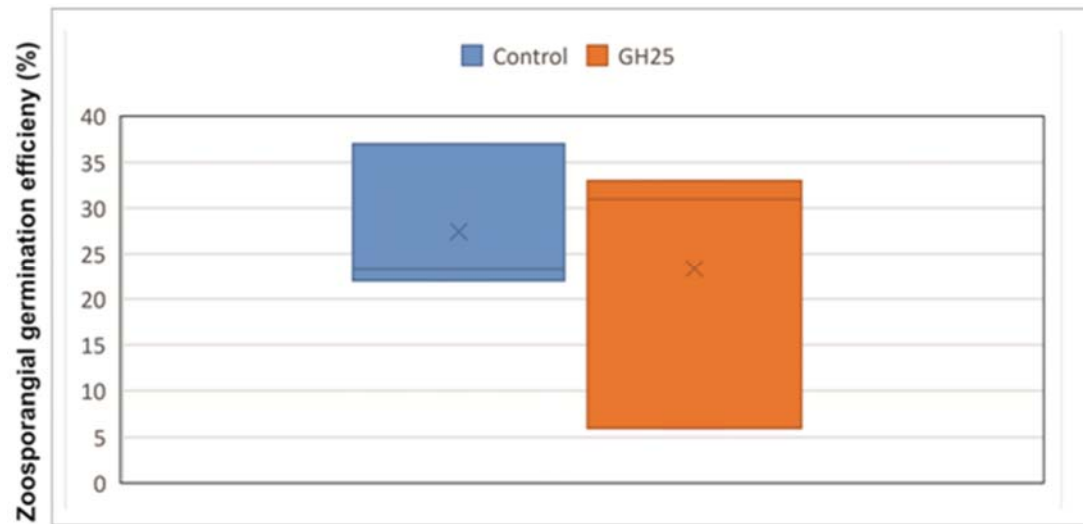

**Figure 7 – figure supplement 5:** Boxplot-analysis of GH 25 treatment on *in vitro* *A. laibachii* zoosporangial germination in three biological replicates analyzing about 100 zoosporangial cells for each replicate. A p value of 0.3 was obtained for paired T-test using one-tailed distribution.
